# Supplementary material for: Plasmodium-specific atypical memory B cells are short-lived activated B cells
Source: eLife. 2018 Nov 2;7:e39800. doi: 10.7554/eLife.39800 (PMC6242553; doi:10.7554/eLife.39800)
Supplement: Supplementary file 1. [file elife-39800-supp1.xlsx]

## Sheet: Sheet1
Gene	Common name	Reference	Functional group	human AMB	Mouse homologue
MS4A1	CD20	MOIR 2008, SULLIVAN 2015	SURFACE PHENOTYPE	↓	Ms4a1
CR2	CD21	MOIR 2008, SULLIVAN 2015, PORTUGAL 2015	SURFACE PHENOTYPE	↓	Cr2
CD24A	CD24	MULLENBECK 2013, SULLIVAN 2015	SURFACE PHENOTYPE	↓	Cd24a
CD40	CD40	LI 2016, PORTUGAL 2015	SURFACE PHENOTYPE	↓	Cd40
ICOSL	ICOSL	LI 2016,	ACTIVATION	↓	Icosl
CD80	CD80	MOIR 2008,	ACTIVATION	↑	Cd80
CD86	CD86	MOIR 2008, PORTUGAL 2015	ACTIVATION	↑	Cd86
FASL	CD95	MOIR 2008, CHARLES 2011	ACTIVATION	↑	Fasl
CD38	CD38	MOIR 2008,	ACTIVATION	↑	Cd38
MKI67	Ki-67	MOIR 2008, MUELLENBECK 2013	ACTIVATION	↑	Mki67
FCGR2B	CD32	SULLIVAN 2015, KARDAVA 2011	INHIBITORY	↑	Fcgr2b
CD22	CD22	MOIR 2008	INHIBITORY	↑	Cd22
CD84	CD84	KARDAVA 2014	INHIBITORY	↑	Cd84
LILRB1	CD85J	MOIR 2008, SULLIVAN 2015, PORTUGAL 2015	INHIBITORY	↑	Lilrb1
LILRB4A	CD85K	MOIR 2008, SULLIVAN 2015, PORTUGAL 2015	INHIBITORY	↑	Lilrb4a
CD72	CD72	MOIR 2008	INHIBITORY	↑	Cd72
LAIR1	LAIR-1	MOIR 2008	INHIBITORY	↑	Lair1
PDCD1	PD-1	KARDAVA 2011, SULLIVAN 2015, PORTUGAL 2015	INHIBITORY	↑	Pdcd1
SIGLEC5	SIGLEC5	KARDAVA 2011, SULLIVAN 2015, PORTUGAL 2015	INHIBITORY	↑	Siglece
SIGLEC6	SIGLEC6	KARDAVA 2011, SULLIVAN 2015, PORTUGAL 2015	INHIBITORY	↑	Siglecf
LILRB3	LILRB-3	PORTUGAL 2015	INHIBITORY	↑	Pirb
CXCR3	CXCR3	MOIR 2008, CHARLES 2011, SULLIVAN 2015	TRAFFICKING	↑	Cxcr3
CXCR5	CXCR5	MOIR 2008, SULLIVAN 2015	TRAFFICKING	↓	Cxcr5
CCR6	CCR6	MOIR 2008, SULLIVAN 2015	TRAFFICKING	↓	Ccr6
CCR7	CCR7	MOIR 2008, PORTUGAL 2015	TRAFFICKING	↓	Ccr7
ITGAX	CD11C	MOIR 2008, CHARLES 2011	TRAFFICKING	↑	Itgax
ITGAM	CD11B	MOIR 2008,	TRAFFICKING	↑	Itgam
SELL	CD62L	MOIR 2008, SULLIVAN 2015	TRAFFICKING	↓	Sell
FCRL3	FCRL3	MOIR 2008, SULLIVAN 2015, PORTUGAL 2015	FCRLs	↑	Fcrl5
TBX21	TBET	RUSSELL KNODE 2017, MOIR 2008, SULLIVAN 2015, KNOX 2017	TRANSCRIPTION FACTORS	↑	Tbx21
IFNG	IFN𝛾	RUSSELL KNODE 2017, MOIR 2008, SULLIVAN 2015, PORTUGAL 2015, KNOX 2017	CITOKINES	↑	Ifng
