# Supplementary material for: Plasmodium-specific atypical memory B cells are short-lived activated B cells
Source: eLife. 2018 Nov 2;7:e39800. doi: 10.7554/eLife.39800 (PMC6242553; doi:10.7554/eLife.39800)
Supplement: Supplementary file 2. [file elife-39800-supp2.xlsx]

## Sheet: Table S1
NAME	SIZE	ES	NES	NOM p-val	FDR q-val	FWER p-val	RANK AT MAX	LEADING EDGE
REACTOME_CELL_CYCLE	373	0.339289	7.70624	0	0	0	5855	tags=55%, list=21%, signal=69%
REACTOME_DNA_REPLICATION	181	0.473532	7.5654	0	0	0	5848	tags=69%, list=21%, signal=87%
REACTOME_CELL_CYCLE_MITOTIC	297	0.371848	7.17186	0	0	0	5848	tags=58%, list=21%, signal=73%
REACTOME_MITOTIC_M_M_G1_PHASES	162	0.460883	6.81717	0	0	0	5848	tags=67%, list=21%, signal=85%
REACTOME_MITOTIC_G1_G1_S_PHASES	126	0.459306	6.13716	0	0	0	5706	tags=67%, list=21%, signal=84%
REACTOME_S_PHASE	104	0.503977	6.04788	0	0	0	5706	tags=71%, list=21%, signal=90%
REACTOME_G1_S_TRANSITION	102	0.50882	6.04086	0	0	0	7022	tags=76%, list=26%, signal=103%
REACTOME_SYNTHESIS_OF_DNA	89	0.545105	5.98767	0	0	0	5706	tags=75%, list=21%, signal=95%
REACTOME_ADAPTIVE_IMMUNE_SYSTEM	455	0.244534	5.97538	0	0	0	6561	tags=48%, list=24%, signal=62%
REACTOME_RESPIRATORY_ELECTRON_TRANSPORT_ATP_SYNTHESIS_BY_CHEMIOSMOTIC_COUPLING_AND_HEAT_PRODUCTION_BY_UNCOUPLING_PROTEINS_	77	0.577117	5.89842	0	0	0	8026	tags=87%, list=29%, signal=123%
REACTOME_HEMOSTASIS	395	0.25801	5.82951	0	0	0	6590	tags=50%, list=24%, signal=65%
REACTOME_CELL_CYCLE_CHECKPOINTS	110	0.455993	5.73076	0	0	0	5706	tags=66%, list=21%, signal=84%
REACTOME_TCA_CYCLE_AND_RESPIRATORY_ELECTRON_TRANSPORT	111	0.445911	5.61468	0	0	0	8026	tags=74%, list=29%, signal=104%
REACTOME_REGULATION_OF_MRNA_STABILITY_BY_PROTEINS_THAT_BIND_AU_RICH_ELEMENTS	81	0.520458	5.60571	0	0	0	5706	tags=73%, list=21%, signal=92%
REACTOME_RESPIRATORY_ELECTRON_TRANSPORT	62	0.593804	5.46362	0	0	0	8026	tags=89%, list=29%, signal=125%
REACTOME_M_G1_TRANSITION	77	0.520485	5.45098	0	0	0	6734	tags=77%, list=25%, signal=101%
REACTOME_CROSS_PRESENTATION_OF_SOLUBLE_EXOGENOUS_ANTIGENS_ENDOSOMES	45	0.686183	5.39352	0	0	0	6763	tags=93%, list=25%, signal=124%
REACTOME_REGULATION_OF_MITOTIC_CELL_CYCLE	75	0.515705	5.31434	0	0	0	6693	tags=76%, list=25%, signal=100%
REACTOME_HIV_INFECTION	176	0.34819	5.27439	0	0	0	7911	tags=64%, list=29%, signal=89%
REACTOME_SCFSKP2_MEDIATED_DEGRADATION_OF_P27_P21	51	0.619071	5.21902	0	0	0	6669	tags=86%, list=24%, signal=114%
REACTOME_APOPTOSIS	134	0.38671	5.20306	0	0	0	7000	tags=64%, list=26%, signal=86%
REACTOME_ORC1_REMOVAL_FROM_CHROMATIN	64	0.55095	5.20283	0	0	0	6734	tags=80%, list=25%, signal=106%
REACTOME_CYCLIN_E_ASSOCIATED_EVENTS_DURING_G1_S_TRANSITION_	60	0.560109	5.19369	0	0	0	7022	tags=82%, list=26%, signal=110%
REACTOME_REGULATION_OF_ORNITHINE_DECARBOXYLASE_ODC	48	0.627638	5.18779	0	0	0	6768	tags=88%, list=25%, signal=116%
REACTOME_APC_C_CDC20_MEDIATED_DEGRADATION_OF_MITOTIC_PROTEINS	65	0.555611	5.18409	0	0	0	6693	tags=80%, list=25%, signal=106%
REACTOME_REGULATION_OF_APOPTOSIS	55	0.574508	5.17673	0	0	0	6669	tags=82%, list=24%, signal=108%
REACTOME_ASSEMBLY_OF_THE_PRE_REPLICATIVE_COMPLEX	63	0.547698	5.16952	0	0	0	6734	tags=79%, list=25%, signal=105%
REACTOME_AUTODEGRADATION_OF_THE_E3_UBIQUITIN_LIGASE_COP1	46	0.625788	5.12599	0	0	0	6669	tags=87%, list=24%, signal=115%
REACTOME_METABOLISM_OF_AMINO_ACIDS_AND_DERIVATIVES	163	0.348711	5.09677	0	0	0	6768	tags=60%, list=25%, signal=79%
REACTOME_CDT1_ASSOCIATION_WITH_THE_CDC6_ORC_ORIGIN_COMPLEX	54	0.587278	5.09473	0	0	0	6734	tags=83%, list=25%, signal=110%
REACTOME_SCF_BETA_TRCP_MEDIATED_DEGRADATION_OF_EMI1	48	0.610409	5.06365	0	0	0	6669	tags=85%, list=24%, signal=113%
REACTOME_P53_DEPENDENT_G1_DNA_DAMAGE_RESPONSE	52	0.60247	5.05902	0	0	0	6669	tags=85%, list=24%, signal=112%
REACTOME_APC_C_CDH1_MEDIATED_DEGRADATION_OF_CDC20_AND_OTHER_APC_C_CDH1_TARGETED_PROTEINS_IN_LATE_MITOSIS_EARLY_G1	64	0.536797	5.04439	0	0	0	6693	tags=78%, list=25%, signal=103%
REACTOME_DESTABILIZATION_OF_MRNA_BY_AUF1_HNRNP_D0	50	0.616298	5.04364	0	0	0	6669	tags=86%, list=24%, signal=114%
REACTOME_SIGNALING_BY_WNT	61	0.543268	5.03549	0	0	0	6669	tags=79%, list=24%, signal=104%
REACTOME_HOST_INTERACTIONS_OF_HIV_FACTORS	113	0.402855	5.03073	0	0	0	6669	tags=65%, list=24%, signal=85%
REACTOME_P53_INDEPENDENT_G1_S_DNA_DAMAGE_CHECKPOINT	48	0.610409	4.99609	0	0	0	6669	tags=85%, list=24%, signal=113%
REACTOME_CDK_MEDIATED_PHOSPHORYLATION_AND_REMOVAL_OF_CDC6	46	0.625788	4.95162	0	0	0	6669	tags=87%, list=24%, signal=115%
REACTOME_VIF_MEDIATED_DEGRADATION_OF_APOBEC3G	46	0.625788	4.90471	0	0	0	6669	tags=87%, list=24%, signal=115%
REACTOME_AUTODEGRADATION_OF_CDH1_BY_CDH1_APC_C	56	0.541112	4.8071	0	0	0	6693	tags=79%, list=25%, signal=104%
REACTOME_ANTIGEN_PROCESSING_CROSS_PRESENTATION	65	0.506771	4.76815	0	0	0	6763	tags=75%, list=25%, signal=100%
REACTOME_ER_PHAGOSOME_PATHWAY	53	0.548687	4.71259	0	0	0	6669	tags=79%, list=24%, signal=105%
REACTOME_SIGNALING_BY_GPCR	434	0.189646	4.55207	0	0	0	9164	tags=52%, list=34%, signal=78%
REACTOME_METABOLISM_OF_PROTEINS	386	0.199935	4.48377	0	0	0	11568	tags=62%, list=42%, signal=107%
REACTOME_PLATELET_ACTIVATION_SIGNALING_AND_AGGREGATION	184	0.282808	4.37286	0	0	0	5968	tags=50%, list=22%, signal=64%
REACTOME_ACTIVATION_OF_NF_KAPPAB_IN_B_CELLS	60	0.474894	4.3662	0	0	0	5706	tags=68%, list=21%, signal=86%
REACTOME_DOWNSTREAM_SIGNALING_EVENTS_OF_B_CELL_RECEPTOR_BCR	91	0.396234	4.34377	0	0	0	5706	tags=60%, list=21%, signal=76%
REACTOME_MITOTIC_PROMETAPHASE	81	0.403787	4.24185	0	0	0	5848	tags=62%, list=21%, signal=78%
REACTOME_GPCR_LIGAND_BINDING	260	0.213734	4.07528	0	0	0	12778	tags=68%, list=47%, signal=127%
REACTOME_CLASS_I_MHC_MEDIATED_ANTIGEN_PROCESSING_PRESENTATION	219	0.237645	4.06938	0	0	0	6763	tags=48%, list=25%, signal=64%
